# Supplementary material for: Analyses of antioxidant status and nucleotide alterations in genes encoding antioxidant enzymes in patients with benign and malignant thyroid disorders
Source: PeerJ. 2017 Jun 1;5:e3365. doi: 10.7717/peerj.3365 (PMC5457668; doi:10.7717/peerj.3365)
Supplement: Supplemental Information 4 [file peerj-05-3365-s004.xlsx]

## Sheet: MNG
		Multinodular goitre (n=9)
		Patients	Thyroiditis
		1	No
		2	No
		3	No
		4	No
		5	No
		6	No
		7	No
		8	No
		9	No

## Sheet: PTC
		Papillary Thyroid Cancer (n=9)
		Patients	Thyroiditis	Anti-TPO (IU/ml)		Anti-TG (IU/ml)		Size					Stage	TNM	Extra-Thyroidal			METS
		1	No			< 20		R: 1.5cm x 1.5cm a proximately,					1	T1bN1M0	No			No
								located in the upper pole.
								Another similar lesion measures 1.2cm x 1cm x 0.7cm
								L: 3cmx1.5cm x 1.5cm
		2	No			< 20		4 x 3 x 2 cm					2	T2NxMo	No			No
		3	No			< 20		6cm x 4.5cm x 3cm					1	T3NxM0	No			Yes
																		Anterior chest
		4	No			< 20		1cm x 1.2cm x 0.8cm					1	T1bNxMo	No			No
		5	Yes			< 20		1.8 x 1.5 x 1.5cm					1	T1bNxMo	No			No
		6	No			< 20		0.2cm x 0.2cm x 0.2cm					1	T1aNoMo	No			No
		7	No			< 20		3.2cm x 2.5cm x 4.7cm					3	T3N0M0	No			No
		8	No			< 20		0.5cm					1	T1aNoMo	No			No
		9	No			< 20		R: disrupted capsular area is seen,					1	T2NoMo	No			No
								measuring 0.8.cm x 0.5.cm in surface area.
								The larger tumour measures 2.5cm x 2cm x 0.8cm,
								located just beneath the disrupted capsular area.
								The smaller tumour is noted adjacent
								to the larger tumour measuring 1.5cm x 1cm x 0.8cm
								L: no malignancy detected

## Sheet: FTC
		Follicular Thyroid Cancer (n=5)
		Patients	Thyroiditis	Anti-TPO (IU/ml)		Anti-TG (IU/ml)		Size				Stage	TNM	Extra-Thyroidal		METS
		1	No	19.3		< 20		1.1x1x1cm				1	T1bNxM0	No		No
		2	No	27.5		< 20		1.7x1.5x2cm				4c	T2NxM1	No		Yes - Lung and ant neck
		3	No	16.5		< 20		Left - 4x3x2cm				4c	T3NxM1	No		Yes - skull, right scapula,
																lung, right proximal femur
		4	No	16.8		< 20		Right sup - 5.5x5x4.5cm				1	T3NxM0	No		No
								Right inf - 6.8x5.8x5cm
								Left thyroid - 0.8x0.5x0.5cm
		5	No	< 10		< 20		R: 1.3x0.9x1.5cm and 1.1x0.8x1.2cm				2	T2NxM0	No		No
								L: 2.6x2.5x2cm and 1.5x1.5x2cm
